# Supplementary material
Source: publisher site journal article supplement (https://www.spandidos-publications.com/5225/downloadSupplementary)
Supplement: Supplementary file 1 [file downloadSupplementary]

## Sheet: up_I-R_vs_N
Table SI. miRNA expression for I-R_vs_N (based on TagCount_ALL_Isoform data).
I-R_vs_N 1.2 fold change UP-regulated miRNAs
miRNA information										TagCount_Mature_Alone						TagCount_Most_Abundant_Seq						TagCount_ALL_Isoform						group_mean		Fold Change, P value(unpaired) and FDR
MATURE-ID	pre-miRNA arm (5p or 3p)	PRE-ID	PRE-ACC	MATURE-SEED	MATURE-LENGTH	MATURE-SEQ	MATURE-ACC	Most_Abundant_Seq	Is_miRBaseMature_Most_Abundant_Seq	I-R1	I-R2	I-R3	N1	N2	N3	I-R1	I-R2	I-R3	N1	N2	N3	I-R1	I-R2	I-R3	N1	N2	N3	I-R	N	I-R vs N Fold change	I-R vs N P-value(unpaired)	I-R vs N FDR
rno-miR-novel-chr16_20027	5p	rno-mir-novel-chr16_20027	MYNO344	AGGAGG	18	CAGGAGGUGUCAGAAAAG	rno-miR-novel-chr16_20027	CAGGAGGTGTCAGAAAAGT	No	8	4	4				26	16	9	1			381	189	119	3	2		239.667	11.6667	20.5429	0.0436341	0.239188
rno-miR-novel-chr5_59812	5p	rno-mir-novel-chr5_59812	MYNO97	GGUGCU	17	GGGUGCUGUAGGCUUUG	rno-miR-novel-chr5_59812	ACCGGGTGCTGTAGGCTTT	No	2	2	2				8238	5672	6774	401	304	331	45084	29895	31068	2427	1498	1401	35359	1785.33	19.8053	0.00235726	0.103124
rno-miR-novel-chr1_36162	3p	rno-mir-novel-chr1_36162	MYNO158	GGUGCU	18	GGGUGCUGUGUAGAAAUA	rno-miR-novel-chr1_36162	ATGCTGTGTAGAAATACC	No	3	3	2				326	220	118	1	12	15	1132	808	408	6	48	44	792.667	42.6667	18.5781	0.023279	0.196752
rno-miR-novel-chr18_24969	3p	rno-mir-novel-chr18_24969	MYNO3	UCCUAG	24	GUCCUAGUCUAGGUGCGAACAAUU	rno-miR-novel-chr18_24969	GTCCTAGTCTAGGTGCGAACAATT	Yes	102	95	40	3	2	3	102	95	40	3	2	3	251	271	164	8	4	4	238.667	15.3333	15.5652	0.00245117	0.103124
rno-miR-novel-chr12_8764	5p	rno-mir-novel-chr12_8764	MYNO235	GGACUG	24	UGGACUGGGCUGUGGAACAGGCCC	rno-miR-novel-chr12_8764	GACATGGACTGGGCTGTGGAACAGGCCC	No	17	8	4		1		17	5	4			1	246	118	75		4	1	156.333	11.6667	13.4	0.048015	0.239188
rno-miR-novel-chr2_40828	5p	rno-mir-novel-chr2_40828	MYNO21	GGAUUG	18	UGGAUUGGGGGCUCCAUC	rno-miR-novel-chr2_40828	TGTCTGGATTGGGGGCTCCATCC	No	6	5	2				18	12	9				152	117	54		1	3	117.667	11.3333	10.3824	0.0207119	0.196752
rno-miR-novel-chr6_66149	5p	rno-mir-novel-chr6_66149	MYNO229	GAGCUC	19	UGAGCUCUGCAUCUGUCUG	rno-miR-novel-chr6_66149	TCTCTGAGCTCTGCATCTGTCTG	No	4	3	1				23	8	4		1	1	205	116	58	1	5	5	136.333	13.6667	9.97561	0.0455561	0.239188
rno-miR-novel-chr5_61973	5p	rno-mir-novel-chr5_61973	MYNO111	AAGACU	19	GAAGACUCUGAUGCUGCAA	rno-miR-novel-chr5_61973	AGTTGAAGACTCTGATGCT	No	3		1				10	5	4			1	111	78	39	1		1	86	10.6667	8.0625	0.0223607	0.196752
rno-miR-novel-chr6_64282	5p	rno-mir-novel-chr6_64282	MYNO311	GGAGCU	17	AGGAGCUAUAGAGAAAG	rno-miR-novel-chr6_64282	AGGAGCTATAGAGAAAGT	No	15	15	4	1	1	1	49	47	14	1	3	2	144	147	46	4	9	5	122.333	16	7.64583	0.0328524	0.239188
rno-miR-novel-chrX_81384	5p	rno-mir-novel-chrX_81384	MYNO439	UGGAUG	17	UUGGAUGUCUGAGUGAC	rno-miR-novel-chrX_81384	TGGATGTCTGAGCGAC	No	6	3	3				49	21	11	3	3	4	214	146	69	6	10	20	153	22	6.95455	0.0357924	0.239188
rno-miR-novel-chrX_82812	3p	rno-mir-novel-chrX_82812	MYNO446	AAUUGG	17	UAAUUGGAGGUAAGAUU	rno-miR-novel-chrX_82812	AATTGGAGGTAAGATTACA	No	6	4	3				16	14	7		2	1	95	118	46		11	2	96.3333	14.3333	6.72093	0.0188741	0.196752
rno-miR-novel-chr9_78175	3p	rno-mir-novel-chr9_78175	MYNO181	GCGGGC	17	CGCGGGCGGGGCCGGGG	rno-miR-novel-chr9_78175	CGGGCGGGGCCGGGGGTG	No			1				6	3	7				68	48	59	1			68.3333	10.3333	6.6129	0.000559276	0.0767484
rno-miR-novel-chr10_2635	3p	rno-mir-novel-chr10_2635	MYNO360	CUCCUC	17	UCUCCUCUGGCUCCUCU	rno-miR-novel-chr10_2635	TCTCCTCTGGCTCCTCTGCT	No	4	1					9	8	6		1		76	55	40		1		67	10.3333	6.48387	0.00559871	0.143376
rno-miR-novel-chr11_6006	5p	rno-mir-novel-chr11_6006	MYNO187	GUGUGC	18	UGUGUGCUCUGCUUUCCA	rno-miR-novel-chr11_6006	AACTGTGTGCTCTGCT	No	1		1				13	7	4		1	1	98	63	39	1	2	3	76.6667	12	6.38889	0.019556	0.196752
rno-miR-novel-chr14_14354	5p	rno-mir-novel-chr14_14354	MYNO164	CGGCGG	17	CCGGCGGCGGGCGCGGG	rno-miR-novel-chr14_14354	CTCCGGCGGCGGGCGCGG	No	1	1	1				13	4	7		1		71	28	55		1		61.3333	10.3333	5.93548	0.0153101	0.19389
rno-miR-novel-chr8_73680	5p	rno-mir-novel-chr8_73680	MYNO346	CAAGGA	18	CCAAGGAAGGCAGCAGGU	rno-miR-novel-chr8_73680	ACATCCAAGGAAGGCAGCA	No	1		2				10	4	2				70	34	35				56.3333	10	5.63333	0.0173304	0.195415
rno-miR-novel-chr1_37450	3p	rno-mir-novel-chr1_37450	MYNO85	CUCUGG	17	GCUCUGGAGGCCUUUGG	rno-miR-novel-chr1_37450	TGCTCTGGAGGCCTTTG	No	3						8	4	2				59	42	14				48.3333	10	4.83333	0.0431595	0.239188
rno-miR-novel-chr12_9087	3p	rno-mir-novel-chr12_9087	MYNO37	AGUGCU	18	CAGUGCUGUAGAACAAAC	rno-miR-novel-chr12_9087	ATCAGTGCTGTAGAACAAAC	No	6	2					9	4	1				57	42	12				47	10	4.7	0.0489642	0.239188
rno-miR-novel-chrX_82339	3p	rno-mir-novel-chrX_82339	MYNO27	UUCAAA	17	GUUCAAAUCCUCUCCCU	rno-miR-novel-chrX_82339	AATCCTCTCCCTAATA	No		2	1				8	3	1				48	49	14				47	10	4.7	0.0323918	0.239188
rno-miR-novel-chr3_53386	3p	rno-mir-novel-chr3_53386	MYNO236	AAUGAC	17	UAAUGACUCUGCUUUGG	rno-miR-novel-chr3_53386	ATGACTCTGCTTTGGATT	No	3	1					11	8	1		1		59	43	13		2		48.3333	10.6667	4.53125	0.0492951	0.239188
rno-miR-novel-chr2_41228	5p	rno-mir-novel-chr2_41228	MYNO342	UGGAGG	19	CUGGAGGCUGAGCAGAAGC	rno-miR-novel-chr2_41228	GAGCTGGAGGCTGAGCA	No		1	1				4	2	2				40	34	19				41	10	4.1	0.00768435	0.156072
rno-miR-novel-chr10_870	5p	rno-mir-novel-chr10_870	MYNO429	GCUGGA	18	AGCUGGAGCUGGAUGACG	rno-miR-novel-chr10_870	AACTGGAGCTGGATGACG	No		1	1				8	4	1				40	36	14	1			40	10.3333	3.87097	0.0214443	0.196752
rno-miR-novel-chr5_61955	5p	rno-mir-novel-chr5_61955	MYNO150	AAGAUG	18	GAAGAUGGAUGCAGACCU	rno-miR-novel-chr5_61955	GAAGAAGATGGATGCAGACCTCT	No	3		1				3	1	2				31	22	25		1		36	10.3333	3.48387	0.000651515	0.0767484
rno-miR-novel-chr4_57144	3p	rno-mir-novel-chr4_57144	MYNO351	UGGAAA	17	CUGGAAACUGGGCAACU	rno-miR-novel-chr4_57144	CTGGAAACTGGGCAACC	No	10	6	2		1		12	7	1				39	26	11		1		35.3333	10.3333	3.41935	0.0366561	0.239188
rno-miR-3068-3p	3p	rno-mir-3068	MI0021534	GUGAAU	22	GGUGAAUUGCAGUACUCCAACA	MIMAT0024846	TGAATTGCAGTACTCCAACATTC	No	15	18	19	21	14	13	134	109	61	7	7	7	304	274	197	85	61	61	268.333	79	3.39662	0.00449911	0.138893
rno-miR-novel-chr12_9531	5p	rno-mir-novel-chr12_9531	MYNO366	UCAGAU	19	UUCAGAUCUGUCCUCAGGA	rno-miR-novel-chr12_9531	TTCAGATCTGTCCTCAGGC	No			1				3	2	1				31	25	8				31.3333	10	3.13333	0.0363204	0.239188
rno-miR-novel-chr16_20521	5p	rno-mir-novel-chr16_20521	MYNO262	GGAGAU	17	AGGAGAUGGAGCAGGCC	rno-miR-novel-chr16_20521	AGGAGATGGAGCAGGCC	Yes	3	2	2				3	2	2				32	13	19				31.3333	10	3.13333	0.0190314	0.196752
rno-miR-novel-chrX_83462	3p	rno-mir-novel-chrX_83462	MYNO19	GACUGU	19	CGACUGUUGCCUCAGUGCC	rno-miR-novel-chrX_83462	CGACTGTTGCCTCAGTGCT	No	7	3	1				10	7	4			1	37	19	11			1	32.3333	10.3333	3.12903	0.0459862	0.239188
rno-miR-1949	3p	rno-mir-1949	MI0015441	AUACCA	23	UAUACCAGGAUGUCAGCAUAGUU	MIMAT0017852	TATACCAGGATGTCAGCATAGTT	Yes	13	13	13	1	1		13	13	13	1	1		19	25	22	1	1		32	10.6667	3	0.000268046	0.0605751
rno-miR-novel-chr8_75946	3p	rno-mir-novel-chr8_75946	MYNO217	UUCCGG	24	UUUCCGGUCUGGUGGUUUUCGAUU	rno-miR-novel-chr8_75946	GTTTCCGGTCTGGTGGTTTTC	No	2		1				4	2	1				31	18	9				29.3333	10	2.93333	0.0388729	0.239188
rno-miR-novel-chr19_27810	5p	rno-mir-novel-chr19_27810	MYNO321	ACUGGC	17	CACUGGCUCCCAGCACC	rno-miR-novel-chr19_27810	GCACTGGCTCCCAGCACT	No		1					8	2	1				23	22	15	1			30	10.3333	2.90323	0.00149567	0.097883
rno-miR-novel-chr1_36664	3p	rno-mir-novel-chr1_36664	MYNO125	GUGAGC	17	UGUGAGCUCUCUGUCCU	rno-miR-novel-chr1_36664	TGTGAGCTCTCTGTCCT	Yes	5	1					5	1					30	16	10				28.6667	10	2.86667	0.0345059	0.239188
rno-miR-novel-chr1_30159	3p	rno-mir-novel-chr1_30159	MYNO380	GGCUGG	17	GGGCUGGAGAGAUGGCU	rno-miR-novel-chr1_30159	TGGAGAGATGGCTCAGC	No		1	1				8	3	3	1	1		28	22	23	2	3	2	34.3333	12.3333	2.78378	0.000308532	0.0605751
rno-miR-novel-chr1_31634	5p	rno-mir-novel-chr1_31634	MYNO377	AGCCCU	18	GAGCCCUGAACCACAGCU	rno-miR-novel-chr1_31634	GACTGAGCCCTGAACCACAGCT	No			1				10	5	2			1	28	13	11			1	27.3333	10.3333	2.64516	0.0340895	0.239188
rno-miR-novel-chr6_66438	3p	rno-mir-novel-chr6_66438	MYNO16	UGGCUG	18	UUGGCUGGACUCCUAUCC	rno-miR-novel-chr6_66438	TTGGCTGGACTCCTATCT	No	8	5	1				7	4	1				24	14	6				24.6667	10	2.46667	0.0479834	0.239188
rno-miR-novel-chr2_43221	3p	rno-mir-novel-chr2_43221	MYNO432	GAGGAU	17	GGAGGAUCGCUUGAGUC	rno-miR-novel-chr2_43221	AGGAGGATCGCTTGAGTC	No	3	2	1				5	2	2				20	10	13				24.3333	10	2.43333	0.00841302	0.159847
rno-miR-novel-chrX_83178	3p	rno-mir-novel-chrX_83178	MYNO277	ACCCAU	20	UACCCAUCGGGGGACUGGCU	rno-miR-novel-chrX_83178	TACCCATCGGGGGACTG	No	1	1	1				4	1					17	15	4				22	10	2.2	0.0411757	0.239188
rno-miR-novel-chr16_19180	5p	rno-mir-novel-chr16_19180	MYNO352	GGGCUG	18	GGGGCUGAGAAGCUGCUG	rno-miR-novel-chr16_19180	GAAAGGGGCTGAGAAGCT	No		1					3	3	2				14	14	7				21.6667	10	2.16667	0.00749043	0.156072
rno-miR-novel-chr1_30587	3p	rno-mir-novel-chr1_30587	MYNO367	ACUGGA	17	CACUGGAGGACCAGGCU	rno-miR-novel-chr1_30587	GACACTGGAGGACCAGGC	No	1	2					4	2					18	11	5				21.3333	10	2.13333	0.0392784	0.239188
rno-miR-novel-chr12_8438	5p	rno-mir-novel-chr12_8438	MYNO137	GACCUG	17	UGACCUGGAGCUCAACU	rno-miR-novel-chr12_8438	CGATGACCTGGAGCT	No	6	2					4	4	1				17	11	4				20.6667	10	2.06667	0.0468894	0.239188
rno-miR-novel-chr12_8442	5p	rno-mir-novel-chr12_8442	MYNO136	GACCUG	17	UGACCUGGAGCUCAACU	rno-miR-novel-chr12_8442	CGATGACCTGGAGCT	No	6	2					4	4	1				17	11	4				20.6667	10	2.06667	0.0468894	0.239188
rno-miR-novel-chr11_6374	5p	rno-mir-novel-chr11_6374	MYNO208	UGCUCC	21	GUGCUCCAUGGUGCUUGUGCU	rno-miR-novel-chr11_6374	CTGTGCTCCATGGTGCTTGTGCT	No			1				4	3					17	7	7				20.3333	10	2.03333	0.0362211	0.239188
rno-miR-novel-chr9_80776	3p	rno-mir-novel-chr9_80776	MYNO414	UCAAGU	20	AUCAAGUAAUACAGGAUAGA	rno-miR-novel-chr9_80776	ATCAAGTAATCCAGGATAGA	No		1	1				39	24	26	10	8	10	63	44	56	23	22	24	64.3333	33	1.94949	0.00493581	0.138893
rno-miR-novel-chr6_67210	3p	rno-mir-novel-chr6_67210	MYNO381	AAGGAG	18	GAAGGAGGAAGAGGAGCU	rno-miR-novel-chr6_67210	GAAGGAGGAAGAGGAGCT	Yes	1	2	1				1	2	1				7	14	7				19.3333	10	1.93333	0.0161301	0.19389
rno-miR-novel-chr1_36164	3p	rno-mir-novel-chr1_36164	MYNO288	CGUGUC	17	CCGUGUCUGGCACUGCU	rno-miR-novel-chr1_36164	CGTGTCTGGCACTGCT	No		1	1				3	1	1				12	5	10				19	10	1.9	0.0124135	0.188832
rno-miR-novel-chr20_40158	3p	rno-mir-novel-chr20_40158	MYNO401	GGUGAG	19	UGGUGAGGCAGGAGACUCA	rno-miR-novel-chr20_40158	CCTGGTGAGGCAGGAGACTCAGC	No	1						3	2	2				15	7	5				19	10	1.9	0.0421391	0.239188
rno-miR-novel-chr1_32773	3p	rno-mir-novel-chr1_32773	MYNO339	UGCUUC	19	GUGCUUCCUGUGUGACUCA	rno-miR-novel-chr1_32773	GTGCTTCCTGTGTGACTCT	No			1										12	10	3				18.3333	10	1.83333	0.0378711	0.239188
rno-miR-23a-3p	3p	rno-mir-23a	MI0000852	UCACAU	21	AUCACAUUGCCAGGGAUUUCC	MIMAT0000792	ATCACATTGCCAGGGATTTCC	Yes	334	433	447	273	203	175	334	433	447	273	203	175	1735	2125	2263	1526	1031	927	2051	1171.33	1.751	0.0224137	0.196752
rno-miR-326-3p	3p	rno-mir-326	MI0000599	CUCUGG	21	CCUCUGGGCCCUUCCUCCAGU	MIMAT0000560	CCTCTGGGCCCTTCCTCCAGT	Yes	12	14	12	6	4	4	12	14	12	6	4	4	29	25	20	14	10	9	34.6667	21	1.65079	0.010596	0.174455
rno-miR-novel-chr4_54843	3p	rno-mir-novel-chr4_54843	MYNO252	CUUAGA	24	CCUUAGAGGAGACAGGAAACACUG	rno-miR-novel-chr4_54843	CCTTAGAGGAGACAGGAAACACTG	Yes	7	4	6		1	1	7	4	6		1	1	8	5	7		1	1	16.6667	10.6667	1.5625	0.00312559	0.112391
rno-miR-novel-chr20_38908	5p	rno-mir-novel-chr20_38908	MYNO45	GCAGGG	17	AGCAGGGCUGUGCUCCC	rno-miR-novel-chr20_38908	AGCAGGGCTGTGCTCCT	No	1	1					2	1					8	6	2				15.3333	10	1.53333	0.0390205	0.239188
rno-miR-novel-chr3_46799	3p	rno-mir-novel-chr3_46799	MYNO364	AAGUGC	17	AAAGUGCUCGACAGACU	rno-miR-novel-chr3_46799	TGAAAGTGCTCGACA	No	1	3	1				3	2					8	6	2				15.3333	10	1.53333	0.0390205	0.239188
rno-miR-505-3p	3p	rno-mir-505	MI0003720	UCAACA	20	GUCAACACUUGCUGGUUUCC	MIMAT0003380	GTCAACACTTGCTGGTTTCCTCT	No	1						22	11	15	12	12	14	76	68	62	37	46	43	78.6667	52	1.51282	0.00530224	0.141955
rno-miR-novel-chr1_33498	5p	rno-mir-novel-chr1_33498	MYNO480	AAGGCU	19	GAAGGCUCUGGACAGCACC	rno-miR-novel-chr1_33498	AAGGCTCTGGACAGCACT	No			1				2	2	1				6	4	4				14.6667	10	1.46667	0.00219213	0.103124
rno-miR-novel-chr19_27105	3p	rno-mir-novel-chr19_27105	MYNO205	CAUGGC	18	ACAUGGCUUCUGUCUCUG	rno-miR-novel-chr19_27105	AACATGGCTTCTGTCTCTGAGCT	No		1					3	1	1				7	4	2				14.3333	10	1.43333	0.0406421	0.239188
rno-miR-novel-chr4_57455	5p	rno-mir-novel-chr4_57455	MYNO31	CUGGAC	25	GCUGGACUGUACUACCUUGCAGAGC	rno-miR-novel-chr4_57455	GCTGGACTGTACTACCTTGCAGAGC	Yes	2	2	1				2	2	1				7	2	4				14.3333	10	1.43333	0.0406421	0.239188
rno-miR-novel-chr13_11217	3p	rno-mir-novel-chr13_11217	MYNO167	UCAGGA	24	GUCAGGAUGGCCGAGCGGUCUAAG	rno-miR-novel-chr13_11217	GTCAGGATGGCCGAGCGGTCTAAG	Yes	2	1	2				2	1	2				4	3	7			1	14.6667	10.3333	1.41935	0.0254815	0.196752
rno-miR-novel-chr13_11289	3p	rno-mir-novel-chr13_11289	MYNO169	UCAGGA	24	GUCAGGAUGGCCGAGCGGUCUAAG	rno-miR-novel-chr13_11289	GTCAGGATGGCCGAGCGGTCTAAG	Yes	2	1	2				2	1	2				4	3	7			1	14.6667	10.3333	1.41935	0.0254815	0.196752
rno-miR-novel-chr13_11297	3p	rno-mir-novel-chr13_11297	MYNO166	UCAGGA	24	GUCAGGAUGGCCGAGCGGUCUAAG	rno-miR-novel-chr13_11297	GTCAGGATGGCCGAGCGGTCTAAG	Yes	2	1	2				2	1	2				4	3	7			1	14.6667	10.3333	1.41935	0.0254815	0.196752
rno-miR-26b-5p	5p	rno-mir-26b	MI0000858	UCAAGU	21	UUCAAGUAAUUCAGGAUAGGU	MIMAT0000797	TTCAAGTAATTCAGGATAGGTT	No	572	684	677	705	607	671	2365	2236	2264	1575	1530	1383	5202	5163	5145	4048	3636	3449	5180	3721	1.3921	0.00120011	0.097883
rno-miR-novel-chr3_51799	5p	rno-mir-novel-chr3_51799	MYNO468	AAGAGC	17	AAAGAGCUUGGAAGUCA	rno-miR-novel-chr3_51799	AAAGAGCTTGGAAGTCA	Yes	1						1						5	5	2	1			14	10.3333	1.35484	0.0253864	0.196752
rno-miR-199a-5p	5p	rno-mir-199a	MI0000941	CCAGUG	23	CCCAGUGUUCAGACUACCUGUUC	MIMAT0000872	CCCAGTGTTCAGACTACCTGTTC	Yes	371	410	387	210	313	374	371	410	387	210	313	374	859	1005	871	575	720	726	921.667	683.667	1.34812	0.024918	0.196752
rno-miR-novel-chr8_72516	5p	rno-mir-novel-chr8_72516	MYNO388	AGGAAA	17	AAGGAAACAGGCCUCUG	rno-miR-novel-chr8_72516	AAGGAAACAGGCCTCT	No		1					1	1					4	4	2				13.3333	10	1.33333	0.00749043	0.156072
rno-miR-23b-3p	3p	rno-mir-23b	MI0000853	UCACAU	21	AUCACAUUGCCAGGGAUUACC	MIMAT0000793	ATCACATTGCCAGGGATTACCACT	No	213	232	230	136	119	120	1240	1315	1440	1057	1117	1247	3031	3231	3451	2427	2395	2523	3247.67	2458.33	1.32109	0.00343471	0.112391
rno-miR-26a-5p	5p	rno-mir-26a	MI0000857	UCAAGU	22	UUCAAGUAAUCCAGGAUAGGCU	MIMAT0000796	TTCAAGTAATCCAGGATAGGCT	Yes	25137	24321	22942	18336	21311	22362	25137	24321	22942	18336	21311	22362	56477	53121	50113	35741	43335	43236	53247	40780.7	1.30569	0.0161039	0.19389
rno-miR-novel-chr6_66277	5p	rno-mir-novel-chr6_66277	MYNO485	GACAAA	19	AGACAAAGAACUCUUGUUC	rno-miR-novel-chr6_66277	AGACAAAGAACTCTTGTTT	No	2						3	2	1				5	2	2				13	10	1.3	0.039942	0.239188
rno-miR-30c-2-3p	3p	rno-mir-30c-2	MI0000871	UGGGAG	22	CUGGGAGAAGGCUGUUUACUCU	MIMAT0005442	CTGGGAGAAGGCTGTTTACTCT	Yes	215	192	191	129	176	165	215	192	191	129	176	165	432	391	407	268	343	329	420	323.333	1.29897	0.0203364	0.196752
rno-miR-1298	5p	rno-mir-1298	MI0021845	UCAUUC	22	UUCAUUCGGCUGUCCAGAUGUA	MIMAT0025060	TTCATTCGGCTGTCCAGATGTA	Yes	1	2					1	2					3	4	1				12.6667	10	1.26667	0.0390205	0.239188
rno-miR-132-3p	3p	rno-mir-132	MI0000905	AACAGU	22	UAACAGUCUACAGCCAUGGUCG	MIMAT0000838	TAACAGTCTACAGCCATGGTCGT	No	3	4	3	2	2	1	12	12	7	7	7	8	17	22	18	14	11	15	29	23.3333	1.24286	0.0434395	0.239188
rno-miR-novel-chr14_15119	5p	rno-mir-novel-chr14_15119	MYNO435	AUGUGG	17	GAUGUGGAGCCUCAGCU	rno-miR-novel-chr14_15119	TGTGGAGCCTCTGCT	No		1					1						3	3	1				12.3333	10	1.23333	0.0248962	0.196752
rno-miR-novel-chr19_27613	3p	rno-mir-novel-chr19_27613	MYNO98	UCUGAG	22	UUCUGAGAGCUCCAGGAGCCCC	rno-miR-novel-chr19_27613	TTCTGAGAGCTCCAGGAGCCCC	Yes		1						1					2	2	3				12.3333	10	1.23333	0.00219213	0.103124
rno-miR-127-5p	5p	rno-mir-127	MI0000899	UGAAGC	23	CUGAAGCUCAGAGGGCUCUGAUU	MIMAT0017117	GAAGCTCAGAGGGCTCTGATT	No	3	1	1		1	1		2	1	1	1	1	5	5	3	1	2	2	14.3333	11.6667	1.22857	0.0232152	0.196752
rno-miR-129-5p	5p	rno-mir-129-1	MI0000902	UUUUUG	21	CUUUUUGCGGUCUGGGCUUGC	MIMAT0000600	CTTTTTGCGGTCTGGGCTTGC	Yes	3	4	2	1	1	1	3	4	2	1	1	1	5	6	3	2	2	2	14.6667	12	1.22222	0.0390205	0.239188
rno-miR-129-5p	5p	rno-mir-129-2	MI0000637	UUUUUG	21	CUUUUUGCGGUCUGGGCUUGC	MIMAT0000600	CTTTTTGCGGTCTGGGCTTGC	Yes	3	4	2	1	1	1	3	4	2	1	1	1	5	6	3	2	2	2	14.6667	12	1.22222	0.0390205	0.239188
rno-miR-99a-3p	3p	rno-mir-99a	MI0000883	AAGCUC	22	CAAGCUCGUUUCUAUGGGUCUG	MIMAT0004724	CAAGCTCGTTTCTATGGGTCTGT	No		1				1	7	4	5	3	5	4	10	9	9	5	7	6	19.3333	16	1.20833	0.00749043	0.156072
rno-miR-novel-chr20_38864	5p	rno-mir-novel-chr20_38864	MYNO121	GACUGC	17	UGACUGCUUCUCCUGAC	rno-miR-novel-chr20_38864	TGACTGCTTCTCCTGAC	Yes		1						1					3	2	1				12	10	1.2	0.0257214	0.196752
rno-miR-novel-chr3_46613	3p	rno-mir-novel-chr3_46613	MYNO216	GACGGU	19	AGACGGUCGGAGUGGAGCU	rno-miR-novel-chr3_46613	GCAAGACGGTCGGAGTGGAGCT	No	2		1					1	1				3	1	2				12	10	1.2	0.0257214	0.196752
rno-miR-novel-chr5_59878	5p	rno-mir-novel-chr5_59878	MYNO238	CAAAGC	23	CCAAAGCAUCGUCUCCACCGUGG	rno-miR-novel-chr5_59878	CCAAAGCATCGTCTCCACCGTGG	Yes	1	1					1	1					3	2	1				12	10	1.2	0.0257214	0.196752
Fold change ≥1.2; P-value≤0.05 (unpaired)
Column A: MATURE-ID, the ID of mature miRNA annotated in miRBase 21.
Column B: pre-miRNA arm (5p or 3p), the position of the mature miRNA on pre-miRNA.
Column C: PRE-ID, the pre-miRNA name.
Column D: PRE-ACC, the pre-miRNA ACCESSION.
Column E: MUTURE-SEED, the seed sequence of the mature miRNA.
Column F: MATURE-LENGTH, the length of the mature miRNA.
Column G: MATURE-SEQ, the sequence of mature miRNA annotated in miRBase 21.
Column H: MATURE-ACC, the mature miRNA ACCESSSION.
Column I: Most_Abundant_Seq, the sequence of the most abundant isomiR.
Column J: Is_miRBaseMature_Most_Abundant_Seq, is the most abundant isomiR the same as the mature miRNA annotated in miRBase 21.
Column K-P: TagCount_Mature_Alone, the normalized tag number of the mature miRNA annotated in miRBase 21 (tpm).
Column Q-V: TagCount_Most_Abundant_Seq, the normalized tag number of most abundant miRNA annotated in miRBase 21 (tpm).
Column W-AG: TagCount_ALL_Isoform, the normalized tag number of all isoform miRNAs annotated in miRBase 21 (tpm), including the averaged number of each group, fold change, P-value(unpaired) and FDR between two groups(based on TagCount_ALL_Isoform data).
Notes:
1. In order to filter out from the analysis those microRNAs expressed at very low levels, we add a given low number (10 units in your case) to each microRNA value [for example, (1000+10)/(500+10)=1.98, while (4+10)/(2+10)=1.16].
2. Tpm: The copy number of transcripts per million based on the total number of reads aligned to known Rat pre-miRNA in miRBase 21.
3. Novel miRNAs have 'novel' string in the names.

## Sheet: down_I-R_vs_N
miRNA expression for I-R_vs_N (based on TagCount_ALL_Isoform data) fold change <=1/1.2 (0.83) p_value <=0.05(unpaired) Column A: MATURE-ID, the ID of mature miRNA annotated in miRBase 21. Column B: pre-miRNA arm (5p or 3p), the position of the mature miRNA on pre-miRNA. Column C: PRE-ID, the pre-miRNA name. Column D: PRE-ACC, the pre-miRNA ACCESSION. Column E: MUTURE-SEED, the seed sequence of th…
I-R_vs_N 1.2 fold change DOWN-regulated miRNAs
miRNA information										TagCount_Mature_Alone						TagCount_Most_Abundant_Seq						TagCount_ALL_Isoform						group_mean		Fold Change, P value(unpaired) and FDR
MATURE-ID	pre-miRNA arm (5p or 3p)	PRE-ID	PRE-ACC	MATURE-SEED	MATURE-LENGTH	MATURE-SEQ	MATURE-ACC	Most_Abundant_Seq	Is_miRBaseMature_Most_Abundant_Seq	I-R1	I-R2	I-R3	N1	N2	N3	I-R1	I-R2	I-R3	N1	N2	N3	I-R1	I-R2	I-R3	N1	N2	N3	I-R	N	I-R vs N Fold change	I-R vs N P-value(unpaired)	I-R vs N FDR
rno-let-7c-1-3p	3p	rno-let-7c-1	MI0000830	UGUACA	22	CUGUACAACCUUCUAGCUUUCC	MIMAT0017087	CTGTACAACCTTCTAGCTTTCT	No				1	2	1			1	3	2	2		2	2	5	4	4	11.3333	14.3333	0.790698	0.0157998	0.19389
rno-miR-novel-chr17_23642	3p	rno-mir-novel-chr17_23642	MYNO473	UCACCU	21	CUCACCUGGAGCAUGUUUUCU	rno-miR-novel-chr17_23642	CTCACCTGGAGCATGTTTTCT	Yes	6	7	4	7	8	8	6	7	4	7	8	8	8	11	9	13	15	16	19.3333	24.6667	0.783784	0.0128867	0.188832
rno-miR-146a-3p	3p	rno-mir-146a	MI0000919	CCUGUG	21	ACCUGUGAAGUUCAGUUCUUU	MIMAT0017132	ACCTGTGAAGTTCAGTTCTTTA	No				1	1	1	1		1	1	3	3	1		1	2	4	5	10.6667	13.6667	0.780488	0.0334717	0.239188
rno-miR-676	3p	rno-mir-676	MI0031786	CGUCCU	22	CCGUCCUGAGCUUGUCGAGCUA	MIMAT0037264	CCGTCCTGAGCTTGTCGAGCTTT	No	22	16	17	23	25	24	120	112	94	108	137	126	416	364	335	450	514	487	381.667	493.667	0.773126	0.0204413	0.196752
rno-miR-99b-5p	5p	rno-mir-99b	MI0000884	ACCCGU	22	CACCCGUAGAACCGACCUUGCG	MIMAT0000821	CACCCGTAGAACCGACCTTGCG	Yes	414	492	534	611	710	608	414	492	534	611	710	608	1187	1472	1487	1887	1799	1691	1392	1802.33	0.772332	0.0220471	0.196752
rno-miR-28-5p	5p	rno-mir-28	MI0000861	AGGAGC	22	AAGGAGCUCACAGUCUAUUGAG	MIMAT0000800	AAGGAGCTCACAGTCTATTGA	No	10	11	12	13	12	13	12	16	14	25	26	30	78	83	70	94	110	108	87	114	0.763158	0.0127768	0.188832
rno-miR-450a-5p	5p	rno-mir-450a	MI0001654	UUUGCG	22	UUUUGCGAUGUGUUCCUAAUGU	MIMAT0001547	TTTTGCGATGTGTTCCTAATGT	Yes	198	180	154	215	240	239	198	180	154	215	240	239	417	404	354	454	534	599	401.667	539	0.745207	0.0408317	0.239188
rno-miR-328a-3p	3p	rno-mir-328a	MI0000602	UGGCCC	22	CUGGCCCUCUCUGCCCUUCCGU	MIMAT0000564	CTGGCCCTCTCTGCCCTTCCGT	Yes	192	201	218	336	271	285	192	201	218	336	271	285	389	453	479	658	574	593	450.333	618.333	0.728302	0.0103988	0.174455
rno-miR-151-3p	3p	rno-mir-151	MI0000647	UAGACU	21	CUAGACUGAGGCUCCUUGAGG	MIMAT0000614	CTAGACTGAGGCTCCTTGAGG	Yes	319	272	354	526	527	501	319	272	354	526	527	501	899	777	894	1387	1184	1116	866.667	1239	0.699489	0.0147568	0.19389
rno-miR-30e-3p	3p	rno-mir-30e	MI0000867	UUUCAG	22	CUUUCAGUCGGAUGUUUACAGC	MIMAT0004720	CTTTCAGTCGGATGTTTACAGT	No	443	388	442	570	486	620	602	588	645	1047	755	933	1743	1562	1792	2524	2073	2734	1709	2453.67	0.696509	0.0228674	0.196752
rno-miR-30d-5p	5p	rno-mir-30d	MI0000869	GUAAAC	22	UGUAAACAUCCCCGACUGGAAG	MIMAT0000807	TGTAAACATCCCCGACTGGAAGC	No	1026	1052	1193	1263	1610	1324	5637	5200	5777	6109	9044	11007	25241	24875	27195	32373	37857	41118	25780.3	37126	0.694401	0.012853	0.188832
rno-miR-361-3p	3p	rno-mir-361	MI0003481	CCCCAG	24	CCCCCAGGUGUGAUUCUGAUUCGU	MIMAT0017199	CCCCCAGGTGTGATTCTGATTCGT	Yes	108	98	121	162	183	207	108	98	121	162	183	207	317	315	372	495	484	492	344.667	500.333	0.688874	0.00119982	0.097883
rno-miR-486	5p	rno-mir-486	MI0031787	CCUGUA	22	UCCUGUACUGAGCUGCCCCGAG	MIMAT0037265	TCCTGTACTGAGCTGCCCCGAGT	No	339	349	448	460	559	526	491	543	625	822	861	1027	1361	1544	1796	2139	2254	2473	1577	2298.67	0.68605	0.0106628	0.174455
rno-let-7a-1-3p	3p	rno-let-7a-1	MI0000827	UAUACA	22	CUAUACAAUCUACUGUCUUUCC	MIMAT0017085	CTATACAATCTACTGTCTTTCT	No	8	10	9	13	10	15	32	34	39	50	53	67	58	59	65	84	88	108	70.6667	103.333	0.683871	0.0134651	0.188832
rno-let-7c-2-3p	3p	rno-let-7c-2	MI0000831	UAUACA	22	CUAUACAAUCUACUGUCUUUCC	MIMAT0017088	CTATACAATCTACTGTCTTTCT	No	8	10	9	13	10	15	32	34	39	50	53	67	58	59	65	84	88	108	70.6667	103.333	0.683871	0.0134651	0.188832
rno-miR-671	3p	rno-mir-671	MI0006156	CCGGUU	21	UCCGGUUCUCAGGGCUCCACC	MIMAT0005326	TCCGGTTCTCAGGGCTCCACCT	No		1	1	1	2	1	2	1		3	2	3	2	5	5	13	8	11	14	20.6667	0.677419	0.0194418	0.196752
rno-miR-30c-5p	5p	rno-mir-30c-1	MI0000866	GUAAAC	23	UGUAAACAUCCUACACUCUCAGC	MIMAT0000804	TGTAAACATCCTACACTCTCAGC	Yes	2057	2438	2938	3735	3743	3769	2057	2438	2938	3735	3743	3769	5960	7041	8170	12065	10197	9860	7067	10717.3	0.659399	0.017584	0.195415
rno-miR-30c-5p	5p	rno-mir-30c-2	MI0000871	GUAAAC	23	UGUAAACAUCCUACACUCUCAGC	MIMAT0000804	TGTAAACATCCTACACTCTCAGC	Yes	2057	2438	2938	3735	3743	3769	2057	2438	2938	3735	3743	3769	5967	7053	8185	12085	10214	9881	7078.33	10736.7	0.659267	0.0175618	0.195415
rno-let-7b-3p	3p	rno-let-7b	MI0000829	UAUACA	22	CUAUACAACCUACUGCCUUCCC	MIMAT0004705	CTATACAACCTACTGCCTTCCT	No	1	1		4	2	3	12	7	10	15	14	20	17	18	15	33	26	33	26.6667	40.6667	0.655738	0.00495204	0.138893
rno-miR-340-3p	3p	rno-mir-340-1	MI0000622	CCGUCU	23	UCCGUCUCAGUUACUUUAUAGCC	MIMAT0000585	TCCGTCTCAGTTACTTTATAGC	No	1	1	1	2	2	2	6	3	4	6	7	7	13	11	15	23	29	28	23	36.6667	0.627273	0.00333654	0.112391
rno-miR-340-3p	3p	rno-mir-340-2	MI0031764	CCGUCU	23	UCCGUCUCAGUUACUUUAUAGCC	MIMAT0000585	TCCGTCTCAGTTACTTTATAGC	No	1	1	1	2	2	2	6	3	4	6	7	7	13	11	15	23	29	28	23	36.6667	0.627273	0.00333654	0.112391
rno-miR-27a-5p	5p	rno-mir-27a	MI0000860	GGGCUU	22	AGGGCUUAGCUGCUUGUGAGCA	MIMAT0004715	AGGGCTTAGCTGCTTGTGAGCA	Yes	24	31	40	53	82	64	24	31	40	53	82	64	47	56	67	77	119	95	66.6667	107	0.623053	0.040168	0.239188
rno-miR-novel-chr4_57750	3p	rno-mir-novel-chr4_57750	MYNO335	AUUGGG	17	AAUUGGGGACAGGGACA	rno-miR-novel-chr4_57750	CAATTGGGGACAGGGATA	No				1		1	1			2	1	2	1	3	2	12	7	12	12	20.3333	0.590164	0.00914076	0.168247
rno-miR-674-3p	3p	rno-mir-674	MI0006159	ACAGCU	22	CACAGCUCCCAUCUCAGAACAA	MIMAT0005330	CACAGCTCCCATCTCAGAAC	No	6	2	6	8	6	12	26	23	26	34	40	62	64	58	65	97	107	140	72.3333	124.667	0.580214	0.0165048	0.194426
rno-miR-128-3p	3p	rno-mir-128-2	MI0000901	CACAGU	21	UCACAGUGAACCGGUCUCUUU	MIMAT0000834	TCACAGTGAACCGGTCTCTTT	Yes	57	65	54	117	85	103	57	65	54	117	85	103	156	190	151	345	258	286	175.667	306.333	0.573449	0.0100453	0.174455
rno-miR-128-3p	3p	rno-mir-128-1	MI0000900	CACAGU	21	UCACAGUGAACCGGUCUCUUU	MIMAT0000834	TCACAGTGAACCGGTCTCTTTAT	No	57	65	54	117	85	103	123	107	113	252	197	235	400	435	382	850	683	772	415.667	778.333	0.534047	0.00201971	0.103124
rno-miR-novel-chr6_66532	3p	rno-mir-novel-chr6_66532	MYNO207	AUUAAU	18	UAUUAAUGGUUGGUUUGU	rno-miR-novel-chr6_66532	TAATGGTTCGTTTGT	No			1				530	820	470	1638	986	1341	957	1290	846	2591	1509	2045	1041	2058.33	0.505749	0.0401289	0.239188
rno-miR-195-3p	3p	rno-mir-195	MI0000939	CAAUAU	23	CCAAUAUUGGCUGUGCUGCUCCA	MIMAT0017149	CCAATATTGGCTGTGCTGCTCT	No	10	8	9	25	38	32	12	18	19	34	36	35	53	68	66	127	159	144	72.3333	153.333	0.471739	0.00145025	0.097883
